# Supplementary material for: Research Transparency in 59 Disciplines of Clinical Medicine: A Meta-Research Study
Source: bioRxiv or medRxiv preprint supplement (doi:10.1101/2024.04.08.24305416), 2024-04-22
Supplement: Supplementary file [file media-1.pdf]

# Research Transparency in 59 Disciplines of Clinical Medicine: A Meta-Research Study

Ahmad Sofi-Mahmudi

## Table of contents

|          |                                                                  |          |
|----------|------------------------------------------------------------------|----------|
| <b>1</b> | <b>Aim</b>                                                       | <b>2</b> |
| <b>2</b> | <b>Results</b>                                                   | <b>2</b> |
| 2.1      | General characteristics . . . . .                                | 3        |
| 2.2      | Category-specific characteristics . . . . .                      | 9        |
| 2.2.1    | Appendix 2 . . . . .                                             | 10       |
| 2.3      | Overall adherence to transparency practices . . . . .            | 13       |
| 2.3.1    | All articles . . . . .                                           | 13       |
| 2.4      | Adherence by number of practices . . . . .                       | 15       |
| 2.4.1    | Reviews . . . . .                                                | 16       |
| 2.4.2    | Trials . . . . .                                                 | 18       |
| 2.5      | Transparency practices by fields over time . . . . .             | 20       |
| 2.5.1    | Overall trend . . . . .                                          | 20       |
| 2.5.2    | Appendix 4: Yearly trends for each field . . . . .               | 33       |
| 2.5.3    | Appendix 3 . . . . .                                             | 39       |
| 2.6      | Association with impact factor and number of citations . . . . . | 42       |
| 2.6.1    | Figure 2 . . . . .                                               | 42       |
| 2.7      | Publisher differences . . . . .                                  | 45       |
| 2.7.1    | Conflict of interest disclosure . . . . .                        | 45       |
| 2.7.2    | Funding disclosure . . . . .                                     | 47       |
| 2.7.3    | Protocol registration . . . . .                                  | 48       |
| 2.7.4    | Data sharing . . . . .                                           | 49       |
| 2.7.5    | Code sharing . . . . .                                           | 49       |

# 1 Aim

We aimed to assess the adherence to five transparent practices (data availability, code availability, protocol registration and conflicts of interest (COI), and funding disclosures) from open-access articles published in medical journals.

# 2 Results

First, loading the needed packages:

```
pacman::p_load(dplyr,
               ggplot2,
               knitr,
               gtsummary,
               tidyr,
               lubridate,
               forcats,
               DiagrammeR,
               tibble,
               ggrepel,
               ggpubr,
               epiR,
               here,
               lme4,
               nortest,
               stringr,
               expss,
               dvmisc,
               sjPlot,
               eply)
```

And then, loading the datasets:

```
transparency = read.csv("data/medicaltransparency_opendata.csv")
transparency = transparency %>% filter(type %in% c("research-article", "review-article", "sy
```

Now, let's create a dataset without the duplicates:

```
unique_transparency = transparency[!duplicated(transparency$pmid), ]
```

## 2.1 General characteristics

Number of all papers (open access and non open access), open-access papers and open-access percentage.

First, we delete duplicated ISSNs to capture the true number of all articles (without any duplication):

```
# ISSNs = read.csv("data/journals.csv")
# ISSNs = ISSNs %>% filter(Category != "MULTIDISCIPLINARY SCIENCES - SCIE")
# ISSNs_unique = ISSNs[!duplicated(ISSNs$ISSN), ]
# ISSNs_unique = ISSNs_unique %>% mutate(search.term = paste0("ISSN:", ISSN))
# ISSNsQuery_unique = ISSNs_unique %>%
#   group_by(Category) %>% summarize(query = paste(search.term,
#   collapse = " OR "))
# ISSNsQuery_unique = as.data.frame(ISSNsQuery_unique)

# hits_list_unique = data.frame()
# hits_list_unique = sapply(ISSNsQuery_unique$query, function(issn) {
#   search_string = paste0(
#     "(",
#     issn,
#     ") ",
#     'AND (SRC:"MED")
#     AND (LANG:"eng" OR LANG:"en" OR LANG:"us")
#     AND (FIRST_PDATE:[1990-01-01 TO 2024-03-16])
#     AND (PUB_TYPE:"research-article" OR PUB_TYPE:"review-article" OR PUB_TYPE:"systematic-r
#   )
#   ePMC_hits(query = search_string)
#})

# hits_list_unique = as.data.frame(hits_list_unique)
# rownames(hits_list_unique) = ISSNsQuery$Category
# write.csv(hits_list_unique, "data/hits_list_unique.csv")
hits_list_unique = read.csv("data/hits_list_unique.csv")
```

Now, we do the same but with duplicates to have the exact number of articles for each category:

```
# ISSNs = ISSNs %>% mutate(search.term = paste0("ISSN:", ISSN))
# ISSNsQuery = ISSNs %>%
#   group_by(Category) %>% summarize(query = paste(search.term,
```

```

#                                                                 collapse = " OR ")
# ISSNsQuery = as.data.frame(ISSNsQuery)

# hits_list = data.frame()
# hits_list = sapply(ISSNsQuery$query, function(issn) {
#   search_string = paste0(
#     "(",
#     issn,
#     ") ",
#     'AND (SRC:"MED")
#     AND (LANG:"eng" OR LANG:"en" OR LANG:"us")
#     AND (FIRST_PDATE:[1990-01-01 TO 2024-03-16])
#     AND (PUB_TYPE:"research-article" OR PUB_TYPE:"review-article" OR PUB_TYPE:"systematic-r
#   )
#   epmc_hits(query = search_string)
#})

# hits_list = as.data.frame(hits_list)
# rownames(hits_list) = ISSNsQuery$Category
# write.csv(hits_list, "data/hits_list.csv")

hits_list = read.csv("data/hits_list.csv")

```

Now, calculating open-access percentage:

```

kable(data.frame(hits_all = sum(hits_list_unique$hits_list_unique),
  hits_oa = nrow(unique_transparency),
  oa_percentage = round((nrow(unique_transparency)/sum(hits_list_unique$hits_list_u

```

| hits_all | hits_oa | oa_percentage |
|----------|---------|---------------|
| 3397155  | 2002955 | 59            |

Let's take a look at the number of papers published in each year and overall. To do so, first, we add the real publication year and month to the datasets. The real publication year/month is the year/month the paper was first appear online stored in firstPublicationDate column.

```

unique_transparency = unique_transparency %>%
  mutate(year_firstpub = year(
    as.POSIXlt(firstPublicationDate,
      format = "%Y-%m-%d")),

```

```

month_firstpub = month(
  as.POSIXlt(firstPublicationDate,
    format = "%Y-%m-%d")
)
)

unique_transparency = unique_transparency %>%
  mutate(pubYear_modified =
    ifelse(year_firstpub < 2000, "< 2000",
    ifelse((year_firstpub >= 2000) & (year_firstpub < 2005), "2000-2004",
    ifelse((year_firstpub >= 2005) & (year_firstpub < 2010), "2005-2009",
    year_firstpub))))

transparency = transparency %>%
  mutate(year_firstpub = year(
    as.POSIXlt(firstPublicationDate,
      format = "%Y-%m-%d")),
    month_firstpub = month(
      as.POSIXlt(firstPublicationDate,
        format = "%Y-%m-%d")
    )
  )

transparency = transparency %>%
  mutate(pubYear_modified =
    ifelse(year_firstpub < 2000, "< 2000",
    ifelse((year_firstpub >= 2000) & (year_firstpub < 2005), "2000-2004",
    ifelse((year_firstpub >= 2005) & (year_firstpub < 2010), "2005-2009",
    year_firstpub))))

```

Now, the number of open access papers per year:

```

unique_transparency %>% tbl_summary(include = c(pubYear_modified),
  digits = list(all_categorical() ~ c(0, 1)))

```

Table printed with ``knitr::kable()``, not `{gt}`. Learn why at <https://www.danieldsjoberg.com/gtsummary/articles/rmarkdown.html>  
 To suppress this message, include ``message = FALSE`` in code chunk header.

| Characteristic   | N = 2,002,955   |
|------------------|-----------------|
| pubYear_modified |                 |
| < 2000           | 40,307 (2.0%)   |
| 2000–2004        | 16,711 (0.8%)   |
| 2005–2009        | 68,021 (3.4%)   |
| 2010             | 30,773 (1.5%)   |
| 2011             | 37,739 (1.9%)   |
| 2012             | 47,077 (2.4%)   |
| 2013             | 62,166 (3.1%)   |
| 2014             | 75,961 (3.8%)   |
| 2015             | 84,894 (4.2%)   |
| 2016             | 91,473 (4.6%)   |
| 2017             | 105,762 (5.3%)  |
| 2018             | 126,410 (6.3%)  |
| 2019             | 149,891 (7.5%)  |
| 2020             | 213,102 (10.6%) |
| 2021             | 276,896 (13.8%) |
| 2022             | 303,395 (15.1%) |
| 2023             | 238,246 (11.9%) |
| 2024             | 34,131 (1.7%)   |

Paper types frequency:

```
unique_transparency %>% tbl_summary(include = c(type),
  digits = list(all_categorical() ~ c(0, 1)))
```

Table printed with ``knitr::kable()``, not `{gt}`. Learn why at <https://www.danieldsjoberg.com/gtsummary/articles/rmarkdown.html>  
 To suppress this message, include ``message = FALSE`` in code chunk header.

| Characteristic    | N = 2,002,955     |
|-------------------|-------------------|
| type              |                   |
| research-article  | 1,741,152 (86.9%) |
| review-article    | 258,470 (12.9%)   |
| systematic-review | 3,333 (0.2%)      |

Now, comparing journals:

```

set.seed(1280)

unique_transparency %>%
  select(journalTitle,
         is_coi_pred,
         is_fund_pred,
         is_register_pred,
         is_open_data,
         is_open_code) %>%
  mutate(journalTitle = fct_lump(journalTitle, n = 5)) %>%
  tbl_summary(by = journalTitle,
             percent = "column",
             label = c(is_coi_pred ~ "COI disclosure",
                       is_fund_pred ~ "Funding disclosure",
                       is_register_pred ~ "Protocol registration",
                       is_open_data ~ "Data sharing",
                       is_open_code ~ "Code sharing"),
             digits = list(all_categorical() ~ c(0, 1))) %>%
  add_p(test.args = all_tests("fisher.test") ~ list(simulate.p.value=TRUE)) %>%
  as_flex_table()

```

| Characteristic        | Front Immunol, N = 32,224 <sup>1</sup> | Int J Environ Res Public Health, N = 59,448 <sup>1</sup> |
|-----------------------|----------------------------------------|----------------------------------------------------------|
| COI disclosure        | 32,174 (99.8%)                         | 58,530 (98.5%)                                           |
| Funding disclosure    | 29,358 (91.1%)                         | 57,781 (97.2%)                                           |
| Protocol registration | 606 (1.9%)                             | 2,581 (4.3%)                                             |
| Data sharing          | 3,204 (9.9%)                           | 1,881 (3.2%)                                             |
| Code sharing          | 400 (1.2%)                             | 320 (0.5%)                                               |

<sup>1</sup>n (%)

<sup>2</sup>Pearson's Chi-squared test

Publishers:

```

set.seed(1280)

unique_transparency %>%
  select(scimago_publisher,
         is_coi_pred,

```

```

    is_fund_pred,
    is_register_pred,
    is_open_data,
    is_open_code) %>%
mutate(scimago_publisher = fct_lump(scimago_publisher, n = 5)) %>%
tbl_summary(by = scimago_publisher,
            percent = "column",
            label = c(is_coi_pred ~ "COI disclosure",
                      is_fund_pred ~ "Funding disclosure",
                      is_register_pred ~ "Protocol registration",
                      is_open_data ~ "Data sharing",
                      is_open_code ~ "Code sharing"),
            digits = list(all_categorical() ~ c(0, 1))) %>%
add_p(test.args = all_tests("fisher.test") ~ list(simulate.p.value=TRUE)) %>%
as_flex_table()

```

190773 observations missing `scimago\_publisher` have been removed. To include these observations

| Characteristic        | Elsevier, N = 86,540 <sup>1</sup> | Frontiers Media S.A., N = 167,114 <sup>1</sup> | John Wiley & |
|-----------------------|-----------------------------------|------------------------------------------------|--------------|
| COI disclosure        | 76,044 (87.9%)                    | 166,674 (99.7%)                                | 101          |
| Funding disclosure    | 73,953 (85.5%)                    | 142,884 (85.5%)                                | 95           |
| Protocol registration | 9,143 (10.6%)                     | 5,194 (3.1%)                                   | 8            |
| Data sharing          | 6,326 (7.3%)                      | 11,831 (7.1%)                                  | 11           |
| Code sharing          | 1,374 (1.6%)                      | 3,474 (2.1%)                                   | 1            |

<sup>1</sup>n (%)

<sup>2</sup>Pearson's Chi-squared test

What about article types?

```

set.seed(1280)

unique_transparency %>%
  select(type,
         is_coi_pred,
         is_fund_pred,

```



```

      is_register_pred,
      is_open_data,
      is_open_code) %>%
mutate(type = fct_lump(type, n = 4)) %>%
tbl_summary(by = type,
            percent = "column",
            label = c(is_coi_pred ~ "COI disclosure",
                      is_fund_pred ~ "Funding disclosure",
                      is_register_pred ~ "Protocol registration",
                      is_open_data ~ "Data sharing",
                      is_open_code ~ "Code sharing"),
            digits = list(all_categorical() ~ c(0, 1))) %>%
add_p(test.args = all_tests("fisher.test") ~ list(simulate.p.value=TRUE)) %>%
as_flex_table()

```

| Characteristic        | research-article, N = 1,741,152 <sup>1</sup> | review-article, N = 258,470 <sup>1</sup> | systematic |
|-----------------------|----------------------------------------------|------------------------------------------|------------|
| COI disclosure        | 1,538,157 (88.3%)                            | 237,981 (92.1%)                          | 3,         |
| Funding disclosure    | 1,443,743 (82.9%)                            | 199,472 (77.2%)                          | 3,         |
| Protocol registration | 122,617 (7.0%)                               | 15,183 (5.9%)                            | 1,         |
| Data sharing          | 156,064 (9.0%)                               | 4,014 (1.6%)                             | 3          |
| Code sharing          | 29,068 (1.7%)                                | 707 (0.3%)                               |            |

<sup>1</sup>n (%)

<sup>2</sup>Pearson's Chi-squared test

## 2.2 Category-specific characteristics

Top categories in terms of number of papers

Top 3 highest:

```
transparency %>% group_by(category) %>% summarise(n = n(), p = round(n/nrow(transparency)*100
```

```
# A tibble: 3 x 3
```

```

  category          n      p
  <chr>          <int> <dbl>
1 Oncology      219797  8.9
2 Medicine, General & Internal 199331  8.07
3 Medicine, Research & Experimental 176858  7.16

```

Top 3 lowest:

```
transparency %>% group_by(category) %>% summarise(n = n(), p = round(n/nrow(transparency)*100
```

```
# A tibble: 3 x 3
```

| category                                | n     | p     |
|-----------------------------------------|-------|-------|
| <chr>                                   | <int> | <dbl> |
| 1 Medicine, Legal                       | 1231  | 0.05  |
| 2 Audiology & Speech-language Pathology | 1571  | 0.06  |
| 3 Medical Ethics                        | 2959  | 0.12  |

Fields with the highest number of trials and reviews

Trials:

```
transparency %>% filter(is_trial == T) %>% group_by(category) %>% summarise(n = n(), p=round
```

```
# A tibble: 3 x 3
```

| category                            | n     | p     |
|-------------------------------------|-------|-------|
| <chr>                               | <int> | <dbl> |
| 1 Medicine, Research & Experimental | 12424 | 13.6  |
| 2 Medicine, General & Internal      | 11344 | 12.5  |
| 3 Oncology                          | 9214  | 10.1  |

Reviews:

```
transparency %>% filter(is_review == T) %>% group_by(category) %>% summarise(n = n(), p=round
```

```
# A tibble: 3 x 3
```

| category                       | n     | p     |
|--------------------------------|-------|-------|
| <chr>                          | <int> | <dbl> |
| 1 Oncology                     | 31676 | 12.1  |
| 2 Medicine, General & Internal | 28982 | 11.1  |
| 3 Pharmacology & Pharmacy      | 26493 | 10.1  |

## 2.2.1 Appendix 2

Column 1: Number of journals in each category

```
ISSNs = read.csv("data/journals.csv")
ISSNs = ISSNs %>% filter(Category != "MULTIDISCIPLINARY SCIENCES - SCIE")
appendix2 = data.frame()
appendix2 = ISSNs %>% group_by(Category) %>% summarise(all_journals = n())
```

Column 2: Available journals in each category based on ISSN

```
appendix2$available_journals_issn = (transparency %>% group_by(category) %>% summarise(available_journals_issn = n()))
```

Column 3: Percentage based on column 2

```
appendix2$availability_percentage_issn = appendix2$available_journals_issn/appendix2$all_journals_issn
```

Column 4: Available journals in each category based on journal title

```
appendix2$available_journals_name = (transparency %>% group_by(category) %>% summarise(available_journals_name = n()))
```

Column 5: Percentage based on column 4

```
appendix2$availability_percentage_name = round(appendix2$available_journals_name/appendix2$all_journals_name)
```

Column 6: All articles

```
appendix2$all_articles_20240316 = hits_list$hits_list
```

Column 7: Open-access articles

```
appendix2$oa_articles_20240316 = table(transparency$category)
```

Column 8: Open-access percentage

```
appendix2$percentage_oa = round(appendix2$oa_articles_20240316/appendix2$all_articles_20240316)
```

Now, we can save it:

```
# write.csv(appendix2, "appendix/Appendix2.csv", row.names = F)
```

Open-access availability based on name:

```
c(mean(appendix2$availability_percentage_name), sd(appendix2$availability_percentage_name))
```

```
[1] 89.178305 8.596136
```

Top 3 categories with the most open-access availability:

```
appendix2 %>% select(Category, oa_articles_20240316, percentage_oa) %>% arrange(desc(percentage_oa))
```

```
# A tibble: 3 x 3
```

| Category                                      | oa_articles_20240316 | percentage_oa |
|-----------------------------------------------|----------------------|---------------|
| 1 INTEGRATIVE & COMPLEMENTARY MEDICINE - SCIE | 21468                | 88.81         |
| 2 TROPICAL MEDICINE - SCIE                    | 32342                | 84.58         |
| 3 MEDICINE, RESEARCH & EXPERIMENTAL - SCIE    | 176858               | 75.84         |

Top 3 categories with the least open-access availability:

```
appendix2 %>% select(Category, oa_articles_20240316, percentage_oa) %>% arrange(percentage_oa)
```

```
# A tibble: 3 x 3
```

| Category                                       | oa_articles_20240316 | percentage_oa |
|------------------------------------------------|----------------------|---------------|
| 1 SUBSTANCE ABUSE - SCIE                       | 3623                 | 16.22         |
| 2 AUDIOLOGY & SPEECH-LANGUAGE PATHOLOGY - SCIE | 1571                 | 16.48         |
| 3 PERIPHERAL VASCULAR DISEASE - SCIE           | 10289                | 24.76         |

And categories:

```
set.seed(1280)

transparency %>%
  select(category,
         is_coi_pred,
         is_fund_pred,
         is_register_pred,
         is_open_data,
         is_open_code) %>%
  mutate(category = fct_lump(category, n = 5)) %>%
  tbl_summary(by = category,
```

```

percent = "column",
label = c(is_coi_pred ~ "COI disclosure",
          is_fund_pred ~ "Funding disclosure",
          is_register_pred ~ "Protocol registration",
          is_open_data ~ "Data sharing",
          is_open_code ~ "Code sharing"),
digits = list(all_categorical() ~ c(0, 1))) %>%
add_p(test.args = all_tests("fisher.test") ~ list(simulate.p.value=TRUE)) %>%
as_flex_table()

```

| Characteristic        | Medicine, General & Internal, N = 199,331 <sup>1</sup> | Medicine, Research & Experim |
|-----------------------|--------------------------------------------------------|------------------------------|
| COI disclosure        | 180,703 (90.7%)                                        | 138,666 (78.4%)              |
| Funding disclosure    | 159,090 (79.8%)                                        | 140,803 (79.6%)              |
| Protocol registration | 25,679 (12.9%)                                         | 12,689 (7.2%)                |
| Data sharing          | 8,795 (4.4%)                                           | 13,920 (7.9%)                |
| Code sharing          | 1,416 (0.7%)                                           | 1,516 (0.9%)                 |

<sup>1</sup>n (%)

<sup>2</sup>Pearson's Chi-squared test

## 2.3 Overall adherence to transparency practices

### 2.3.1 All articles

Number and percentage:

```

kable(rbind(
  COI = data.frame(number = length(unique_transparency$is_coi_pred[unique_transparency$is_coi_pred == 1]),
    percentage = round(length(unique_transparency$is_coi_pred[unique_transparency$is_coi_pred == 1]) / length(unique_transparency$is_coi_pred) * 100, 1)),
  Fund = data.frame(number = length(unique_transparency$is_fund_pred[unique_transparency$is_fund_pred == 1]),
    percentage = round(length(unique_transparency$is_fund_pred[unique_transparency$is_fund_pred == 1]) / length(unique_transparency$is_fund_pred) * 100, 1)),
  Register = data.frame(number = length(unique_transparency$is_register_pred[unique_transparency$is_register_pred == 1]),
    percentage = round(length(unique_transparency$is_register_pred[unique_transparency$is_register_pred == 1]) / length(unique_transparency$is_register_pred) * 100, 1)),
  Data = data.frame(number = length(unique_transparency$is_open_data[unique_transparency$is_open_data == 1]),
    percentage = round(length(unique_transparency$is_open_data[unique_transparency$is_open_data == 1]) / length(unique_transparency$is_open_data) * 100, 1)),
  Code = data.frame(number = length(unique_transparency$is_open_code[unique_transparency$is_open_code == 1]),
    percentage = round(length(unique_transparency$is_open_code[unique_transparency$is_open_code == 1]) / length(unique_transparency$is_open_code) * 100, 1))
))

```

```

    ),
    Code = data.frame(number = length(unique_transparency$is_open_code[unique_transparen
      percentage = round(length(unique_transparency$is_open_code[unique_transparency$is
    )
  ))

```

|          | number  | percentage |
|----------|---------|------------|
| COI      | 1779458 | 88.8       |
| Fund     | 1646303 | 82.2       |
| Register | 139764  | 7.0        |
| Data     | 160397  | 8.0        |
| Code     | 29786   | 1.5        |

And CIs:

```

kable(rbind(COI=round(epi.prev(pos = length(unique_transparency$is_coi_pred[unique_transparen
  tested = nrow(unique_transparency),
  se = 0.992,
  sp = 0.995)$ap,
1),
Funding=round(epi.prev(pos = length(unique_transparency$is_fund_pred[unique_transparen
  tested = nrow(unique_transparency),
  se = 0.997,
  sp = 0.981)$ap,
1),
Protocol=round(epi.prev(pos = length(unique_transparency$is_register_pred[unique_transp
  tested = nrow(unique_transparency),
  se = 0.955,
  sp = 0.997)$ap,
1),
Data=round(epi.prev(pos = length(unique_transparency$is_open_data[unique_transparency$
  tested = nrow(unique_transparency),
  se = 0.758,
  sp = 0.986)$ap,
1),
Code=round(epi.prev(pos = length(unique_transparency$is_open_code[unique_transparen
  tested = nrow(unique_transparency),
  se = 0.587,
  sp = 0.997)$ap,
1)))

```

|          | est  | lower | upper |
|----------|------|-------|-------|
| COI      | 88.8 | 88.8  | 88.9  |
| Funding  | 82.2 | 82.1  | 82.2  |
| Protocol | 7.0  | 6.9   | 7.0   |
| Data     | 8.0  | 8.0   | 8.0   |
| Code     | 1.5  | 1.5   | 1.5   |

## 2.4 Adherence by number of practices

```
unique_transparency = unique_transparency %>% mutate(sumOfIndicators = rowSums(unique_transp
```

Number of papers with each number of TRUE indicators:

```
c(five_ind = nrow(filter(unique_transparency, sumOfIndicators == 5)),
  four_ind = nrow(filter(unique_transparency, sumOfIndicators == 4)),
  three_ind = nrow(filter(unique_transparency, sumOfIndicators == 3)),
  two_ind = nrow(filter(unique_transparency, sumOfIndicators == 2)),
  one_ind = nrow(filter(unique_transparency, sumOfIndicators == 1)),
  zero_ind = nrow(filter(unique_transparency, sumOfIndicators == 0)))
```

```
five_ind four_ind three_ind two_ind one_ind zero_ind
      419   22512  247187 1298604  324796  109437
```

Percentage of papers with each number of TRUE indicators:

```
c(five_ind = round(nrow(filter(unique_transparency, sumOfIndicators == 5))/nrow(unique_transp
  four_ind = round(nrow(filter(unique_transparency, sumOfIndicators == 4))/nrow(unique_transp
  three_ind = round(nrow(filter(unique_transparency, sumOfIndicators == 3))/nrow(unique_transp
  two_ind = round(nrow(filter(unique_transparency, sumOfIndicators == 2))/nrow(unique_transp
  one_ind = round(nrow(filter(unique_transparency, sumOfIndicators == 1))/nrow(unique_transp
  zero_ind = round(nrow(filter(unique_transparency, sumOfIndicators == 0))/nrow(unique_transp
```

```
five_ind four_ind three_ind two_ind one_ind zero_ind
  0.0209   1.1000  12.3000  64.8000  16.2000   5.5000
```

## 2.4.1 Reviews

Number and percentage:

```
reviews = unique_transparency %>% filter(is_review == T)

kable(rbind(
  COI = data.frame(number = length(reviews$is_coi_pred[reviews$is_coi_pred == TRUE]),
    percentage = round(length(reviews$is_coi_pred[reviews$is_coi_pred == TRUE])/nrow(
    )),
  Fund = data.frame(number = length(reviews$is_fund_pred[reviews$is_fund_pred == TRUE]),
    percentage = round(length(reviews$is_fund_pred[reviews$is_fund_pred == TRUE])/nrow(
    )),
  Register = data.frame(number = length(reviews$is_register_pred[reviews$is_register_p
    percentage = round(length(reviews$is_register_pred[reviews$is_register_pred == TRU
    )),
  Data = data.frame(number = length(reviews$is_open_data[reviews$is_open_data == TRUE]),
    percentage = round(length(reviews$is_open_data[reviews$is_open_data == TRUE])/nrow(
    )),
  Code = data.frame(number = length(reviews$is_open_code[reviews$is_open_code == TRUE]),
    percentage = round(length(reviews$is_open_code[reviews$is_open_code == TRUE])/nrow(
    ))
  ))
```

|          | number | percentage |
|----------|--------|------------|
| COI      | 241301 | 92.2       |
| Fund     | 202560 | 77.4       |
| Register | 17147  | 6.5        |
| Data     | 4333   | 1.7        |
| Code     | 718    | 0.3        |

And CIs:

```
kable(rbind(COI=round(epi.prev(pos = length(reviews$is_coi_pred[reviews$is_coi_pred == TRUE]),
  tested = nrow(reviews),
  se = 0.992,
  sp = 0.995)$ap,
1),
Funding=round(epi.prev(pos = length(reviews$is_fund_pred[reviews$is_fund_pred == TRUE]),
  tested = nrow(reviews),
  se = 0.997,
```



```

    sp = 0.981)$ap,
  1),
  Protocol=round(epi.prev(pos = length(reviews$is_register_pred[reviews$is_register_pred
    tested = nrow(reviews),
    se = 0.955,
    sp = 0.997)$ap,
  1),
  Data=round(epi.prev(pos = length(reviews$is_open_data[reviews$is_open_data == TRUE]),
    tested = nrow(reviews),
    se = 0.758,
    sp = 0.986)$ap,
  1),
  Code=round(epi.prev(pos = length(reviews$is_open_code[reviews$is_open_code == TRUE]),
    tested = nrow(reviews),
    se = 0.587,
    sp = 0.997)$ap,
  1)))

```

Warning in epi.prev(pos = length(reviews\$is\_open\_code[reviews\$is\_open\_code == :  
 Apparent prevalence is less than (1 - Sp). Rogan Gladen estimate of true  
 prevalence invalid.

|          | est  | lower | upper |
|----------|------|-------|-------|
| COI      | 92.2 | 92.1  | 92.3  |
| Funding  | 77.4 | 77.2  | 77.5  |
| Protocol | 6.5  | 6.5   | 6.6   |
| Data     | 1.7  | 1.6   | 1.7   |
| Code     | 0.3  | 0.3   | 0.3   |

Percentage of papers with each number of TRUE indicators:

```

c(five_ind = round(nrow(filter(reviews, sumOfIndicators == 5))/nrow(reviews)*100, 4),
  four_ind = round(nrow(filter(reviews, sumOfIndicators == 4))/nrow(reviews)*100, 1),
  three_ind = round(nrow(filter(reviews, sumOfIndicators == 3))/nrow(reviews)*100, 1),
  two_ind = round(nrow(filter(reviews, sumOfIndicators == 2))/nrow(reviews)*100, 1),
  one_ind = round(nrow(filter(reviews, sumOfIndicators == 1))/nrow(reviews)*100, 1),
  zero_ind = round(nrow(filter(reviews, sumOfIndicators == 0))/nrow(reviews)*100, 1))

```

```

five_ind  four_ind  three_ind  two_ind  one_ind  zero_ind
0.0118    0.4000    6.7000    67.8000  20.5000  4.5000

```

## 2.4.2 Trials

Number and percentage:

```
trials = unique_transparency %>% filter(is_trial == T)

kable(rbind(
  COI = data.frame(number = length(trials$is_coi_pred[trials$is_coi_pred == TRUE]),
    percentage = round(length(trials$is_coi_pred[trials$is_coi_pred == TRUE])/nrow(trials), 1),
  ),
  Fund = data.frame(number = length(trials$is_fund_pred[trials$is_fund_pred == TRUE]),
    percentage = round(length(trials$is_fund_pred[trials$is_fund_pred == TRUE])/nrow(trials), 1),
  ),
  Register = data.frame(number = length(trials$is_register_pred[trials$is_register_pred == TRUE]),
    percentage = round(length(trials$is_register_pred[trials$is_register_pred == TRUE])/nrow(trials), 1),
  ),
  Data = data.frame(number = length(trials$is_open_data[trials$is_open_data == TRUE]),
    percentage = round(length(trials$is_open_data[trials$is_open_data == TRUE])/nrow(trials), 1),
  ),
  Code = data.frame(number = length(trials$is_open_code[trials$is_open_code == TRUE]),
    percentage = round(length(trials$is_open_code[trials$is_open_code == TRUE])/nrow(trials), 1),
  )
))
```

|          | number | percentage |
|----------|--------|------------|
| COI      | 84689  | 93.1       |
| Fund     | 80102  | 88.0       |
| Register | 54282  | 59.6       |
| Data     | 4118   | 4.5        |
| Code     | 335    | 0.4        |

And CIs:

```
kable(rbind(COI=round(epi.prev(pos = length(trials$is_coi_pred[trials$is_coi_pred == TRUE]),
  tested = nrow(trials),
  se = 0.992,
  sp = 0.995)$ap,
1),
Funding=round(epi.prev(pos = length(trials$is_fund_pred[trials$is_fund_pred == TRUE]),
  tested = nrow(trials),
  se = 0.997,
```

```

    sp = 0.981)$ap,
  1),
  Protocol=round(epi.prev(pos = length(trials$is_register_pred[trials$is_register_pred ==
    tested = nrow(trials),
    se = 0.955,
    sp = 0.997)$ap,
  1),
  Data=round(epi.prev(pos = length(trials$is_open_data[trials$is_open_data == TRUE]),
    tested = nrow(trials),
    se = 0.758,
    sp = 0.986)$ap,
  1),
  Code=round(epi.prev(pos = length(trials$is_open_code[trials$is_open_code == TRUE]),
    tested = nrow(trials),
    se = 0.587,
    sp = 0.997)$ap,
  1)))

```

|          | est  | lower | upper |
|----------|------|-------|-------|
| COI      | 93.1 | 92.9  | 93.2  |
| Funding  | 88.0 | 87.8  | 88.2  |
| Protocol | 59.6 | 59.3  | 60.0  |
| Data     | 4.5  | 4.4   | 4.7   |
| Code     | 0.4  | 0.3   | 0.4   |

Percentage of papers with each number of TRUE indicators:

```

c(five_ind = round(nrow(filter(trials, sumOfIndicators == 5))/nrow(trials)*100, 4),
  four_ind = round(nrow(filter(trials, sumOfIndicators == 4))/nrow(trials)*100, 1),
  three_ind = round(nrow(filter(trials, sumOfIndicators == 3))/nrow(trials)*100, 1),
  two_ind = round(nrow(filter(trials, sumOfIndicators == 2))/nrow(trials)*100, 1),
  one_ind = round(nrow(filter(trials, sumOfIndicators == 1))/nrow(trials)*100, 1),
  zero_ind = round(nrow(filter(trials, sumOfIndicators == 0))/nrow(trials)*100, 1))

```

```

five_ind four_ind three_ind two_ind one_ind zero_ind
0.0934    3.0000  53.3000  32.4000  8.6000  2.7000

```

## 2.5 Transparency practices by fields over time

### 2.5.1 Overall trend

First, we calculate the proportion of adherence to each domain overall and yearly adherence to each domain:

```
# Overall
proportions = unique_transparency %>%
  summarise("COI disclosure" = sum(is_coi_pred == TRUE),
            "Funding disclosure" = sum(is_fund_pred == TRUE),
            "Protocol registration" = sum(is_register_pred == TRUE),
            "Data sharing" = sum(is_open_data == TRUE),
            "Code sharing" = sum(is_open_code == TRUE)) %>%
  t() %>%
  as.data.frame() %>%
  rownames_to_column(var = "indicator") %>%
  mutate(percentage = round(V1/nrow(unique_transparency)*100, 1))

indicator_by_year =
  unique_transparency %>%
  select(pubYear_modified,
         is_coi_pred,
         is_fund_pred,
         is_register_pred,
         is_open_data,
         is_open_code) %>%
  gather("indicator", "value", -pubYear_modified) %>%
  count(pubYear_modified, indicator, value) %>%
  mutate(indicator = dplyr::recode(indicator,
                                   is_coi_pred = "COI disclosure",
                                   is_fund_pred = "Funding disclosure",
                                   is_register_pred = "Protocol registration",
                                   is_open_data = "Data sharing",
                                   is_open_code = "Code sharing")) %>%
  complete(indicator, value, pubYear_modified, fill = list(n = 0)) %>%
  group_by(pubYear_modified, indicator) %>%
  mutate(p = n / sum(n)) %>%
  filter(value) %>%
  ungroup()
```

```

# For reviews
proportions_reviews = unique_transparency %>%
  filter(is_review == T) %>%
  summarise("COI disclosure" = sum(is_coi_pred == TRUE),
            "Funding disclosure" = sum(is_fund_pred == TRUE),
            "Protocol registration" = sum(is_register_pred == TRUE),
            "Data sharing" = sum(is_open_data == TRUE),
            "Code sharing" = sum(is_open_code == TRUE)) %>%
  t() %>%
  as.data.frame() %>%
  rownames_to_column(var = "indicator") %>%
  mutate(percentage = round(V1/nrow(filter(unique_transparency, is_review == T))*100, 1)

indicator_by_year_reviews =
  unique_transparency %>%
  filter(is_review == T) %>%
  select(pubYear_modified,
         is_coi_pred,
         is_fund_pred,
         is_register_pred,
         is_open_data,
         is_open_code) %>%
  gather("indicator", "value", -pubYear_modified) %>%
  count(pubYear_modified, indicator, value) %>%
  mutate(indicator = dplyr::recode(indicator,
                                   is_coi_pred = "COI disclosure",
                                   is_fund_pred = "Funding disclosure",
                                   is_register_pred = "Protocol registration",
                                   is_open_data = "Data sharing",
                                   is_open_code = "Code sharing")) %>%
  complete(indicator, value, pubYear_modified, fill = list(n = 0)) %>%
  group_by(pubYear_modified, indicator) %>%
  mutate(p = n / sum(n)) %>%
  filter(value) %>%
  ungroup()

# For trials
proportions_trials = unique_transparency %>%
  filter(is_trial == T) %>%
  summarise("COI disclosure" = sum(is_coi_pred == TRUE),

```

```

        "Funding disclosure" = sum(is_fund_pred == TRUE),
        "Protocol registration" = sum(is_register_pred == TRUE),
        "Data sharing" = sum(is_open_data == TRUE),
        "Code sharing" = sum(is_open_code == TRUE)) %>%
t() %>%
as.data.frame() %>%
rownames_to_column(var = "indicator") %>%
mutate(percentage = round(V1/nrow(filter(unique_transparency, is_trial == T))*100, 1

indicator_by_year_trials =
  unique_transparency %>%
  filter(is_trial == T) %>%
  select(pubYear_modified,
         is_coi_pred,
         is_fund_pred,
         is_register_pred,
         is_open_data,
         is_open_code) %>%
  gather("indicator", "value", -pubYear_modified) %>%
  count(pubYear_modified, indicator, value) %>%
  mutate(indicator = dplyr::recode(indicator,
                                   is_coi_pred = "COI disclosure",
                                   is_fund_pred = "Funding disclosure",
                                   is_register_pred = "Protocol registration",
                                   is_open_data = "Data sharing",
                                   is_open_code = "Code sharing")) %>%
  complete(indicator, value, pubYear_modified, fill = list(n = 0)) %>%
  group_by(pubYear_modified, indicator) %>%
  mutate(p = n / sum(n)) %>%
  filter(value) %>%
  ungroup()

```

Now, we create plots:

```

### Figure 1A - left
p1 = proportions %>%
  ggplot() +
  aes(
    x = reorder(indicator, V1),
    y = V1,
    fill = indicator

```

```

) +
geom_col() +
geom_text(aes(label = percentage), hjust = -0.1, size = 4) +
coord_flip() +
labs(title = "A - All articles",
      x = NULL,
      y = NULL) +
theme_minimal() +
theme(legend.position = "none",
      panel.grid.major.y = element_blank(),
      axis.text = element_text(size = 10),
      plot.title = element_text(size=14, face="bold")) +
scale_fill_manual(values = c("red", viridis::viridis(6)))

### Figure 1A - right

data_ends = indicator_by_year %>%
  filter(pubYear_modified == 2024)

plasma_pal <- c("blue", viridis::plasma(n = 5))

p2 = indicator_by_year %>%
  ggplot() +
  aes(
    x = pubYear_modified,
    y = p,
    group = indicator,
    color = indicator
  ) +
  geom_line() +
  labs(title = NULL,
        y = NULL,
        x = NULL) +
  geom_text_repel(
    aes(label = indicator),
    data = data_ends,
    nudge_x = 2,
    size = 3
  ) +
  scale_y_continuous(limits = c(0, 1), labels = scales::percent) +
  theme_minimal() +
  theme(legend.position = "none") +

```

```

scale_color_manual(values = c("red", viridis::viridis(6)))+
  theme(axis.text.x = element_text(angle = 45),
        axis.text = element_text(size = 10))

```

### Fig 1A

```

figure1A = ggarrange(p1, p2,
                    ncol = 2, nrow = 1,
                    align = "hv", common.legend = F)

```

Warning in grid.Call(C\_textBounds, as.graphicsAnnot(x\$label), x\$x, x\$y, :  
conversion failure on '2000-2004' in 'mbsToSbcs': dot substituted for <e2>

Warning in grid.Call(C\_textBounds, as.graphicsAnnot(x\$label), x\$x, x\$y, :  
conversion failure on '2000-2004' in 'mbsToSbcs': dot substituted for <80>

Warning in grid.Call(C\_textBounds, as.graphicsAnnot(x\$label), x\$x, x\$y, :  
conversion failure on '2000-2004' in 'mbsToSbcs': dot substituted for <93>

Warning in grid.Call(C\_textBounds, as.graphicsAnnot(x\$label), x\$x, x\$y, :  
conversion failure on '2005-2009' in 'mbsToSbcs': dot substituted for <e2>

Warning in grid.Call(C\_textBounds, as.graphicsAnnot(x\$label), x\$x, x\$y, :  
conversion failure on '2005-2009' in 'mbsToSbcs': dot substituted for <80>

Warning in grid.Call(C\_textBounds, as.graphicsAnnot(x\$label), x\$x, x\$y, :  
conversion failure on '2005-2009' in 'mbsToSbcs': dot substituted for <93>

### Figure 1B - left

```

p1_reviews = proportions_reviews %>%
  ggplot() +
  aes(
    x = reorder(indicator, V1),
    y = V1,
    fill = indicator
  ) +
  geom_col() +
  geom_text(aes(label = percentage), hjust = -0.1, size = 4) +
  coord_flip() +
  labs(title = "B - Reviews",

```



```

      x = NULL,
      y = NULL) +
theme_minimal() +
theme(legend.position = "none",
      panel.grid.major.y = element_blank(),
      axis.text = element_text(size = 10),
      plot.title = element_text(size=14, face="bold")) +
scale_fill_manual(values = c("red", viridis::viridis(6)))

### Figure 1B - right

data_ends_reviews = indicator_by_year_reviews %>%
  filter(pubYear_modified == 2024)

p2_reviews = indicator_by_year_reviews %>%
  ggplot() +
  aes(
    x = pubYear_modified,
    y = p,
    group = indicator,
    color = indicator
  ) +
  geom_line() +
  labs(title = NULL,
       y = "Proportion of articles",
       x = NULL) +
  geom_text_repel(
    aes(label = indicator),
    data = data_ends_reviews,
    nudge_x = 2,
    size = 3
  ) +
  scale_y_continuous(limits = c(0, 1), labels = scales::percent) +
  theme_minimal() +
  theme(legend.position = "none") +
  scale_color_manual(values = c("red", viridis::viridis(6)))+
  theme(axis.text.x = element_text(angle = 45),
        axis.text = element_text(size = 10))

### Fig 1B
figure1B = ggarrange(p1_reviews, p2_reviews,

```

```
ncol = 2, nrow = 1,  
align = "hv", common.legend = F)
```

Warning in grid.Call(C\_textBounds, as.graphicsAnnot(x\$label), x\$x, x\$y, :  
conversion failure on '2000-2004' in 'mbsToSbcs': dot substituted for <e2>

Warning in grid.Call(C\_textBounds, as.graphicsAnnot(x\$label), x\$x, x\$y, :  
conversion failure on '2000-2004' in 'mbsToSbcs': dot substituted for <80>

Warning in grid.Call(C\_textBounds, as.graphicsAnnot(x\$label), x\$x, x\$y, :  
conversion failure on '2000-2004' in 'mbsToSbcs': dot substituted for <93>

Warning in grid.Call(C\_textBounds, as.graphicsAnnot(x\$label), x\$x, x\$y, :  
conversion failure on '2005-2009' in 'mbsToSbcs': dot substituted for <e2>

Warning in grid.Call(C\_textBounds, as.graphicsAnnot(x\$label), x\$x, x\$y, :  
conversion failure on '2005-2009' in 'mbsToSbcs': dot substituted for <80>

Warning in grid.Call(C\_textBounds, as.graphicsAnnot(x\$label), x\$x, x\$y, :  
conversion failure on '2005-2009' in 'mbsToSbcs': dot substituted for <93>

```
### Figure 1C - left  
p1_trials = proportions_trials %>%  
  ggplot() +  
  aes(  
    x = reorder(indicator, V1),  
    y = V1,  
    fill = indicator  
  ) +  
  geom_col() +  
  geom_text(aes(label = percentage), hjust = -0.1, size = 4) +  
  coord_flip() +  
  labs(title = "C - Trials",  
        x = NULL,  
        y = "Number of articles") +  
  theme_minimal() +  
  theme(legend.position = "none",  
        panel.grid.major.y = element_blank(),  
        axis.text = element_text(size = 10),  
        plot.title = element_text(size=14, face="bold")) +
```

```

    scale_fill_manual(values = c("red", viridis::viridis(6)))

### Figure 1C - right

data_ends_trials = indicator_by_year_trials %>%
  filter(pubYear_modified == 2024)

p2_trials = indicator_by_year_trials %>%
  ggplot() +
  aes(
    x = pubYear_modified,
    y = p,
    group = indicator,
    color = indicator
  ) +
  geom_line() +
  labs(title = NULL,
    y = NULL,
    x = "Year") +
  geom_text_repel(
    aes(label = indicator),
    data = data_ends_trials,
    nudge_x = 2,
    size = 3
  ) +
  scale_y_continuous(limits = c(0, 1), labels = scales::percent) +
  theme_minimal() +
  theme(legend.position = "none") +
  scale_color_manual(values = c("red", viridis::viridis(6)))+
  theme(axis.text.x = element_text(angle = 45),
    axis.text = element_text(size = 10))

### Fig 1C
figure1C = ggarrange(p1_trials, p2_trials,
  ncol = 2, nrow = 1,
  align = "hv", common.legend = F)

```

Warning in grid.Call(C\_textBounds, as.graphicsAnnot(x\$label), x\$x, x\$y, :  
conversion failure on '2000-2004' in 'mbsToSbcs': dot substituted for <e2>

Warning in grid.Call(C\_textBounds, as.graphicsAnnot(x\$label), x\$x, x\$y, :

conversion failure on '2000-2004' in 'mbcstoSbcs': dot substituted for <80>

Warning in grid.Call(C\_textBounds, as.graphicsAnnot(x\$label), x\$x, x\$y, :  
conversion failure on '2000-2004' in 'mbcstoSbcs': dot substituted for <93>

Warning in grid.Call(C\_textBounds, as.graphicsAnnot(x\$label), x\$x, x\$y, :  
conversion failure on '2005-2009' in 'mbcstoSbcs': dot substituted for <e2>

Warning in grid.Call(C\_textBounds, as.graphicsAnnot(x\$label), x\$x, x\$y, :  
conversion failure on '2005-2009' in 'mbcstoSbcs': dot substituted for <80>

Warning in grid.Call(C\_textBounds, as.graphicsAnnot(x\$label), x\$x, x\$y, :  
conversion failure on '2005-2009' in 'mbcstoSbcs': dot substituted for <93>

```
# Figure 1
figure1 = ggarrange(figure1A, figure1B, figure1C,
                    ncol = 1, nrow = 3,
                    align = "hv", common.legend = F)

#ggsave("figures/Figure1.tiff", figure1, width = 35, height = 30, units = "cm", dpi = 800, c
#ggsave("figures/Figure1.png", figure1, width = 35, height = 30, units = "cm", dpi = 800)
```

figure1

Warning in grid.Call.graphics(C\_text, as.graphicsAnnot(x\$label), x\$x, x\$y, :  
conversion failure on '2000-2004' in 'mbcstoSbcs': dot substituted for <e2>

Warning in grid.Call.graphics(C\_text, as.graphicsAnnot(x\$label), x\$x, x\$y, :  
conversion failure on '2000-2004' in 'mbcstoSbcs': dot substituted for <80>

Warning in grid.Call.graphics(C\_text, as.graphicsAnnot(x\$label), x\$x, x\$y, :  
conversion failure on '2000-2004' in 'mbcstoSbcs': dot substituted for <93>

Warning in grid.Call.graphics(C\_text, as.graphicsAnnot(x\$label), x\$x, x\$y, :  
conversion failure on '2005-2009' in 'mbcstoSbcs': dot substituted for <e2>

Warning in grid.Call.graphics(C\_text, as.graphicsAnnot(x\$label), x\$x, x\$y, :  
conversion failure on '2005-2009' in 'mbcstoSbcs': dot substituted for <80>

Warning in grid.Call.graphics(C\_text, as.graphicsAnnot(x\$label), x\$x, x\$y, :  
conversion failure on '2005-2009' in 'mbscsToSbcs': dot substituted for <93>

Warning in grid.Call.graphics(C\_text, as.graphicsAnnot(x\$label), x\$x, x\$y, :  
conversion failure on '2000-2004' in 'mbscsToSbcs': dot substituted for <e2>

Warning in grid.Call.graphics(C\_text, as.graphicsAnnot(x\$label), x\$x, x\$y, :  
conversion failure on '2000-2004' in 'mbscsToSbcs': dot substituted for <80>

Warning in grid.Call.graphics(C\_text, as.graphicsAnnot(x\$label), x\$x, x\$y, :  
conversion failure on '2000-2004' in 'mbscsToSbcs': dot substituted for <93>

Warning in grid.Call.graphics(C\_text, as.graphicsAnnot(x\$label), x\$x, x\$y, :  
conversion failure on '2005-2009' in 'mbscsToSbcs': dot substituted for <e2>

Warning in grid.Call.graphics(C\_text, as.graphicsAnnot(x\$label), x\$x, x\$y, :  
conversion failure on '2005-2009' in 'mbscsToSbcs': dot substituted for <80>

Warning in grid.Call.graphics(C\_text, as.graphicsAnnot(x\$label), x\$x, x\$y, :  
conversion failure on '2005-2009' in 'mbscsToSbcs': dot substituted for <93>

Warning in grid.Call.graphics(C\_text, as.graphicsAnnot(x\$label), x\$x, x\$y, :  
conversion failure on '2000-2004' in 'mbscsToSbcs': dot substituted for <e2>

Warning in grid.Call.graphics(C\_text, as.graphicsAnnot(x\$label), x\$x, x\$y, :  
conversion failure on '2000-2004' in 'mbscsToSbcs': dot substituted for <80>

Warning in grid.Call.graphics(C\_text, as.graphicsAnnot(x\$label), x\$x, x\$y, :  
conversion failure on '2000-2004' in 'mbscsToSbcs': dot substituted for <93>

Warning in grid.Call.graphics(C\_text, as.graphicsAnnot(x\$label), x\$x, x\$y, :  
conversion failure on '2005-2009' in 'mbscsToSbcs': dot substituted for <e2>

Warning in grid.Call.graphics(C\_text, as.graphicsAnnot(x\$label), x\$x, x\$y, :  
conversion failure on '2005-2009' in 'mbscsToSbcs': dot substituted for <80>

Warning in grid.Call.graphics(C\_text, as.graphicsAnnot(x\$label), x\$x, x\$y, :  
conversion failure on '2005-2009' in 'mbscsToSbcs': dot substituted for <93>

### A – All articles

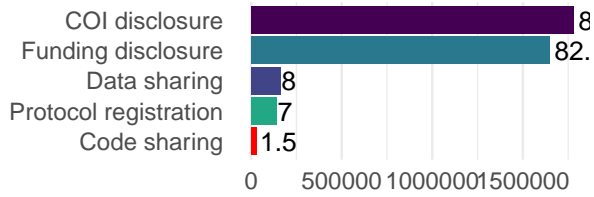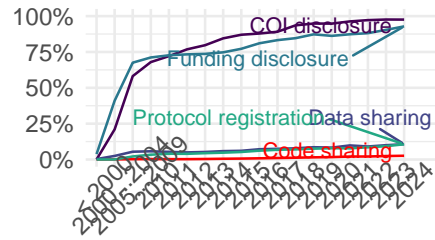

### B – Reviews

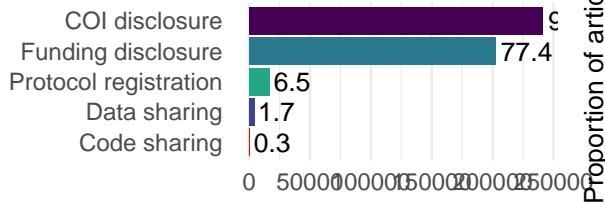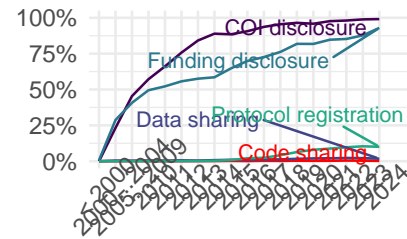

### C – Trials

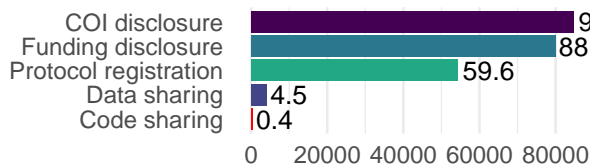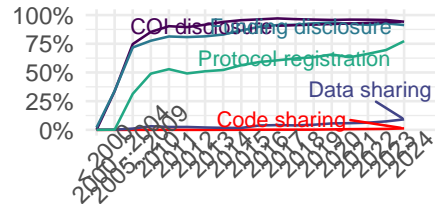

Number of articles

Year

Now, testing the correlation between year and each transparency indicator:

```
indicator_by_year_all =
  unique_transparency %>%
  select(year_firstpub,
         is_coi_pred,
         is_fund_pred,
         is_register_pred,
         is_open_data,
         is_open_code) %>%
  gather("indicator", "value", -year_firstpub) %>%
  count(year_firstpub, indicator, value) %>%
  mutate(indicator = dplyr::recode(indicator,
                                   is_coi_pred = "COI disclosure",
```

```

        is_fund_pred = "Funding disclosure",
        is_register_pred = "Protocol registration",
        is_open_data = "Data sharing",
        is_open_code = "Code sharing")) %>%
complete(indicator, value, year_firstpub, fill = list(n = 0)) %>%
group_by(year_firstpub, indicator) %>%
mutate(p = n / sum(n)) %>%
filter(value) %>%
ungroup()

cor.test(filter(indicator_by_year_all, indicator == "COI disclosure")$year_firstpub, filter(

```

Pearson's product-moment correlation

```

data: filter(indicator_by_year_all, indicator == "COI disclosure")$year_firstpub and filter
t = 9.7513, df = 121, p-value < 2.2e-16
alternative hypothesis: true correlation is not equal to 0
95 percent confidence interval:
 0.5510357 0.7520713
sample estimates:
      cor
0.663358

```

```

cor.test(filter(indicator_by_year_all, indicator == "Funding disclosure")$year_firstpub, fil

```

Pearson's product-moment correlation

```

data: filter(indicator_by_year_all, indicator == "Funding disclosure")$year_firstpub and fi
t = 11.306, df = 121, p-value < 2.2e-16
alternative hypothesis: true correlation is not equal to 0
95 percent confidence interval:
 0.6181589 0.7931467
sample estimates:
      cor
0.7167549

```

```

cor.test(filter(indicator_by_year_all, indicator == "Protocol registration")$year_firstpub,

```

Pearson's product-moment correlation

```
data: filter(indicator_by_year_all, indicator == "Protocol registration")$year_firstpub and
t = 7.9115, df = 121, p-value = 1.355e-12
alternative hypothesis: true correlation is not equal to 0
95 percent confidence interval:
 0.4537639 0.6896400
sample estimates:
      cor
0.5838931
```

```
cor.test(filter(indicator_by_year_all, indicator == "Data sharing")$year_firstpub, filter(in
```

Pearson's product-moment correlation

```
data: filter(indicator_by_year_all, indicator == "Data sharing")$year_firstpub and filter(in
t = 10.47, df = 121, p-value < 2.2e-16
alternative hypothesis: true correlation is not equal to 0
95 percent confidence interval:
 0.5836425 0.7722217
sample estimates:
      cor
0.6894406
```

```
cor.test(filter(indicator_by_year_all, indicator == "Code sharing")$year_firstpub, filter(in
```

Pearson's product-moment correlation

```
data: filter(indicator_by_year_all, indicator == "Code sharing")$year_firstpub and filter(in
t = 6.6146, df = 121, p-value = 1.068e-09
alternative hypothesis: true correlation is not equal to 0
95 percent confidence interval:
 0.3722595 0.6344817
sample estimates:
      cor
0.515332
```



## 2.5.2 Appendix 4: Yearly trends for each field

```
indicator_by_year_all_fields =
  transparency %>%
  select(category,
         pubYear_modified,
         is_coi_pred,
         is_fund_pred,
         is_register_pred,
         is_open_data,
         is_open_code) %>%
  gather("indicator", "value", -pubYear_modified, -category) %>%
  count(category, pubYear_modified, indicator, value) %>%
  mutate(indicator = dplyr::recode(indicator,
                                   is_coi_pred = "COI Disclosure",
                                   is_fund_pred = "Funding disclosure",
                                   is_register_pred = "Protocol registration",
                                   is_open_data = "Data sharing",
                                   is_open_code = "Code sharing")) %>%
  complete(indicator, value, pubYear_modified, category, fill = list(n = 0)) %>%
  group_by(category, pubYear_modified, indicator) %>%
  mutate(p = n / sum(n)) %>%
  filter(value) %>%
  ungroup()

transparency_all_fields = indicator_by_year_all_fields %>%
  ggplot() +
  aes(x = pubYear_modified,
      y = p,
      group = indicator,
      color = indicator) +
  geom_line(size = 0.75) +
  facet_wrap(~ category, ncol = 10) +
  scale_y_continuous(limits = c(0, 1),
                    labels = scales::percent) +
  scale_color_discrete(name = NULL) +
  scale_fill_discrete(breaks = c("COI Disclosure",
                                 "Funding disclosure",
                                 "Protocol registration",
                                 "Data sharing",
                                 "Code sharing")) +
  labs(y = "Proportion of articles\n",
```

```
x = "\nYear") +
  theme(panel.grid.minor = element_blank(),
        legend.position = c(0.955, 0.001),
        axis.text.x = element_text(angle = 70, vjust = 0.9, hjust=1, size = 7))
```

```
transparency_all_fields
```

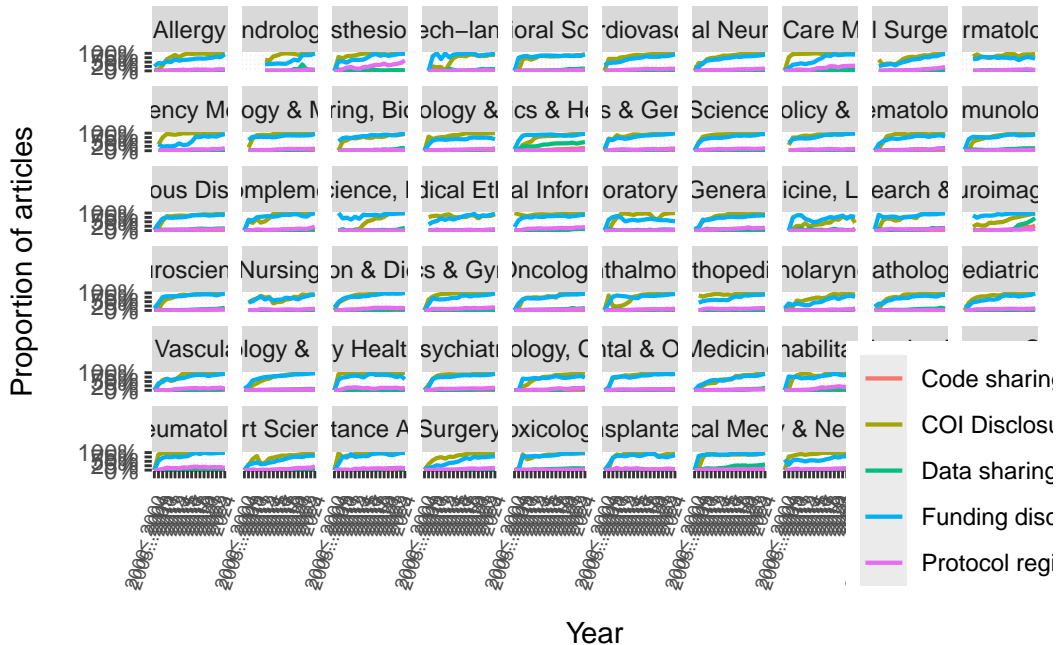

```
#ggsave("appendix/Appendix4.tiff", transparency_all_fields, width = 18, height = 8, units = "cm")
#ggsave("appendix/Appendix4.png", transparency_all_fields, width = 18, height = 8, units = "cm")
```

### 2.5.2.1 GLMM: Yearly trend of adherence to transparency practices among different fields

COI disclosure:

```
coi_glmmer = glmer(is_coi_pred ~ year_firstpub + (1|category), data = transparency, family = "binomial")
summary(coi_glmmer)
```

```
Generalized linear mixed model fit by maximum likelihood (Adaptive Gauss-Hermite Quadrature, nAGQ = 10) [glmerMod]
Family: binomial ( logit )
```

```
Formula: is_coi_pred ~ year_firstpub + (1 | category)
Data: transparency
Control: glmerControl(optimizer = "bobyqa", optCtrl = list(maxfun = 2e+05))
```

```
      AIC      BIC  logLik deviance df.resid
1227570 1227608 -613782 1227564 2471010
```

Scaled residuals:

```
      Min      1Q   Median      3Q      Max
-25.3150  0.1452  0.1979  0.2973  28.9552
```

Random effects:

```
Groups Name      Variance Std.Dev.
category (Intercept) 0.8      0.8944
Number of obs: 2471013, groups: category, 59
```

Fixed effects:

```
      Estimate Std. Error z value Pr(>|z|)
(Intercept) -4.818e+02 1.950e-01 -2471 <2e-16 ***
year_firstpub 2.401e-01 1.113e-04 2157 <2e-16 ***
---
```

```
Signif. codes:  0 '***' 0.001 '**' 0.01 '*' 0.05 '.' 0.1 ' ' 1
```

Correlation of Fixed Effects:

```
      (Intr)
year_frstpb -0.857
optimizer (bobyqa) convergence code: 0 (OK)
Model failed to converge with max|grad| = 0.0359188 (tol = 0.002, component 1)
Model is nearly unidentifiable: very large eigenvalue
- Rescale variables?
Model is nearly unidentifiable: large eigenvalue ratio
- Rescale variables?
```

Funding disclosure:

```
fund_glmer = glmer(is_fund_pred ~ year_firstpub + (1|category), data = transparency, family =
summary(fund_glmer)
```

```
Generalized linear mixed model fit by maximum likelihood (Adaptive
Gauss-Hermite Quadrature, nAGQ = 10) [glmerMod]
Family: binomial ( logit )
```

```
Formula: is_fund_pred ~ year_firstpub + (1 | category)
Data: transparency
Control: glmerControl(optimizer = "bobyqa", optCtrl = list(maxfun = 2e+05))
```

```
      AIC      BIC  logLik deviance df.resid
2012165 2012204 -1006080 2012159 2471010
```

Scaled residuals:

```
      Min      1Q  Median      3Q      Max
-6.220  0.267  0.346  0.450 46.638
```

Random effects:

```
Groups Name Variance Std.Dev.
category (Intercept) 0.3603 0.6003
Number of obs: 2471013, groups: category, 59
```

Fixed effects:

```
      Estimate Std. Error z value Pr(>|z|)
(Intercept) -2.651e+02 2.815e-01 -941.6 <2e-16 ***
year_firstpub 1.321e-01 1.428e-04 925.1 <2e-16 ***
---
```

```
Signif. codes:  0 '***' 0.001 '**' 0.01 '*' 0.05 '.' 0.1 ' ' 1
```

Correlation of Fixed Effects:

```
      (Intr)
year_frstpb -0.963
optimizer (bobyqa) convergence code: 0 (OK)
Model failed to converge with max|grad| = 0.0308105 (tol = 0.002, component 1)
Model is nearly unidentifiable: very large eigenvalue
- Rescale variables?
Model is nearly unidentifiable: large eigenvalue ratio
- Rescale variables?
```

Protocol registration:

```
register_glmer = glmer(is_register_pred ~ year_firstpub + (1|category), data = transparency,
summary(register_glmer)
```

```
Generalized linear mixed model fit by maximum likelihood (Adaptive
Gauss-Hermite Quadrature, nAGQ = 10) [glmerMod]
Family: binomial ( logit )
```

```
Formula: is_register_pred ~ year_firstpub + (1 | category)
Data: transparency
Control: glmerControl(optimizer = "bobyqa", optCtrl = list(maxfun = 2e+05))
```

```
      AIC      BIC  logLik deviance df.resid
1173022 1173060 -586508 1173016 2471010
```

Scaled residuals:

```
      Min      1Q  Median      3Q      Max
-0.8765 -0.3208 -0.2424 -0.1753 18.4747
```

Random effects:

```
Groups   Name      Variance Std.Dev.
category (Intercept) 0.7428   0.8619
Number of obs: 2471013, groups:  category, 59
```

Fixed effects:

```
      Estimate Std. Error z value Pr(>|z|)
(Intercept) -1.717e+02  1.917e-01  -895.9  <2e-16 ***
year_firstpub  8.370e-02  1.095e-04   764.6  <2e-16 ***
---
```

```
Signif. codes:  0 '***' 0.001 '**' 0.01 '*' 0.05 '.' 0.1 ' ' 1
```

Correlation of Fixed Effects:

```
(Intr)
year_frstpb -0.862
```

```
optimizer (bobyqa) convergence code: 0 (OK)
```

```
Model failed to converge with max|grad| = 0.00453864 (tol = 0.002, component 1)
```

```
Model is nearly unidentifiable: very large eigenvalue
```

```
- Rescale variables?
```

```
Model is nearly unidentifiable: large eigenvalue ratio
```

```
- Rescale variables?
```

Data sharing:

```
data_glmer = glmer(is_open_data ~ year_firstpub + (1|category), data = transparency, family =
summary(data_glmer)
```

Generalized linear mixed model fit by maximum likelihood (Adaptive

```
Gauss-Hermite Quadrature, nAGQ = 10) [glmerMod]
```

```
Family: binomial ( logit )
```

```
Formula: is_open_data ~ year_firstpub + (1 | category)
Data: transparency
Control: glmerControl(optimizer = "bobyqa", optCtrl = list(maxfun = 2e+05))
```

```
          AIC          BIC    logLik deviance df.resid
1148882.8 1148920.9 -574438.4 1148876.8   2471010
```

Scaled residuals:

```
      Min       1Q   Median       3Q      Max
-1.0861 -0.2812 -0.2184 -0.1649  18.5164
```

Random effects:

```
Groups   Name          Variance Std.Dev.
category (Intercept) 0.5648    0.7515
Number of obs: 2471013, groups:  category, 59
```

Fixed effects:

```
          Estimate Std. Error z value Pr(>|z|)
(Intercept) -2.087e+02  2.145e-01  -973.2  <2e-16 ***
year_firstpub  1.019e-01  1.162e-04   876.7  <2e-16 ***
---
```

```
Signif. codes:  0 '***' 0.001 '**' 0.01 '*' 0.05 '.' 0.1 ' ' 1
```

Correlation of Fixed Effects:

```
(Intr)
year_frstpb -0.909
```

```
optimizer (bobyqa) convergence code: 0 (OK)
```

```
Model failed to converge with max|grad| = 0.00329572 (tol = 0.002, component 1)
```

```
Model is nearly unidentifiable: very large eigenvalue
```

```
- Rescale variables?
```

```
Model is nearly unidentifiable: large eigenvalue ratio
```

```
- Rescale variables?
```

Code sharing:

```
code_glmer = glmer(is_open_code ~ year_firstpub + (1|category), data = transparency, family =
summary(code_glmer)
```

Generalized linear mixed model fit by maximum likelihood (Adaptive

Gauss-Hermite Quadrature, nAGQ = 10) [glmerMod]

Family: binomial (logit)

```
Formula: is_open_code ~ year_firstpub + (1 | category)
Data: transparency
Control: glmerControl(optimizer = "bobyqa", optCtrl = list(maxfun = 2e+05))
```

```
      AIC      BIC   logLik deviance df.resid
322897.9 322936.1 -161446.0 322891.9  2471010
```

Scaled residuals:

```
      Min      1Q  Median      3Q      Max
-0.582 -0.120 -0.087 -0.055  78.146
```

Random effects:

```
Groups   Name      Variance Std.Dev.
category (Intercept) 1.311    1.145
Number of obs: 2471013, groups:  category, 59
```

Fixed effects:

```
      Estimate Std. Error z value Pr(>|z|)
(Intercept) -4.206e+02  4.208e-01 -999.5   <2e-16 ***
year_firstpub  2.057e-01  2.210e-04  930.9   <2e-16 ***
---
```

```
Signif. codes:  0 '***' 0.001 '**' 0.01 '*' 0.05 '.' 0.1 ' ' 1
```

Correlation of Fixed Effects:

```
      (Intr)
year_frstpb -0.942
optimizer (bobyqa) convergence code: 0 (OK)
Model failed to converge with max|grad| = 0.0226471 (tol = 0.002, component 1)
Model is nearly unidentifiable: very large eigenvalue
- Rescale variables?
Model is nearly unidentifiable: large eigenvalue ratio
- Rescale variables?
```

### 2.5.3 Appendix 3

```
percent_calc = function(indicator){
  x = round(sum(indicator)/n()*100, 1)
  return(x)
}

transparency_by_field = transparency %>%
```

```

group_by(category) %>%
  summarise("COI Disclosure" = sum(is_coi_pred == TRUE),
            "COI Disclosure %" = percent_calc(is_coi_pred == TRUE),
            "Funding disclosure" = sum(is_fund_pred == TRUE),
            "Funding disclosure %" = percent_calc(is_fund_pred == TRUE),
            "Protocol registration" = sum(is_register_pred == TRUE),
            "Protocol registration %" = percent_calc(is_register_pred == TRUE),
            "Data sharing" = sum(is_open_data == TRUE),
            "Data sharing %" = percent_calc(is_open_data == TRUE),
            "Code sharing" = sum(is_open_code == TRUE),
            "Code sharing %" = percent_calc(is_open_code == TRUE))

# write.csv(transparency_by_field, "appendix/Appendix3.csv", row.names = F)

```

Now, min and max for each indicator based on category. For COI disclosure:

```
transparency_by_field %>% arrange(desc(`COI Disclosure`)) %>% filter(row_number() %in% c(1
```

```

# A tibble: 6 x 2
  category          `COI Disclosure`
  <chr>              <dbl>
1 Rheumatology      98.1
2 Primary Health Care 97.4
3 Emergency Medicine 96.8
4 Neuroimaging      71.5
5 Toxicology        67.5
6 Medicine, Legal   61.6

```

For funding disclosure:

```
transparency_by_field %>% arrange(desc(`Funding disclosure`)) %>% filter(row_number() %in%
```

```

# A tibble: 6 x 2
  category          `Funding disclosure`
  <chr>              <dbl>
1 Neuroimaging      94.9
2 Materials Science, Biomaterials 94
3 Audiology & Speech-language Pathology 93.3
4 Critical Care Medicine 64.8
5 Andrology         64.7
6 Medical Laboratory Technology 60.3

```



Protocol registration:

```
transparency_by_field %>% arrange(desc(`Protocol registration`)) %>% filter(row_number() %
```

```
# A tibble: 6 x 2
  category                `Protocol registration`
  <chr>                    <dbl>
1 Anesthesiology          34.5
2 Rehabilitation          17.2
3 Critical Care Medicine  15.2
4 Virology                 1.2
5 Genetics & Heredity     0.9
6 Materials Science, Biomaterials 0.3
```

Data sharing:

```
transparency_by_field %>% arrange(desc(`Data sharing`)) %>% filter(row_number() %in% c(1:3
```

```
# A tibble: 6 x 2
  category                `Data sharing`
  <chr>                    <dbl>
1 Genetics & Heredity     37.9
2 Neuroimaging            24.7
3 Virology                 23.5
4 Orthopedics              1.6
5 Primary Health Care     1.6
6 Surgery                  1.6
```

Code sharing:

```
transparency_by_field %>% arrange(desc(`Code sharing`)) %>% filter(row_number() %in% c(1:3
```

```
# A tibble: 6 x 2
  category                `Code sharing`
  <chr>                    <dbl>
1 Neuroimaging            12.4
2 Genetics & Heredity     7.6
3 Medical Informatics     6.3
4 Integrative & Complementary Medicine 0.1
5 Nursing                  0.1
6 Orthopedics              0.1
```

## 2.6 Association with impact factor and number of citations

Adding impact factor variable:

```
impact_factors = read.csv("data/journals.csv")

matches = str_extract(unique_transparency$journalIssn, paste(impact_factors$ISSN, collapse =
matching_rows = !is.na(matches)

unique_transparency$jif2020[matching_rows] = impact_factors$X2020.JIF[match(matches[matching
unique_transparency$jif2020 = as.numeric(unique_transparency$jif2020)
```

Warning: NAs introduced by coercion

### 2.6.1 Figure 2

```
unique_transparency$jif2020_5 = factor(quant_groups(unique_transparency$jif2020, 5))
```

Observations per group: 400075, 401982, 397605, 411196, 388541. 3556 missing.

```
levels(unique_transparency$jif2020_5) = c("Q1", "Q2", "Q3", "Q4", "Q5")
unique_transparency = apply_labels(unique_transparency,
  jif2020_5 = "Journal Impact Factor",
  is_coi_pred = "COI disclosure",
  is_fund_pred = "Funding disclosure",
  is_register_pred = "Protocol registration",
  is_open_data = "Data sharing",
  is_open_code = "Code sharing")

coi_jif = glm(is_coi_pred ~ jif2020_5 + year_firstpub, family = "binomial", data = unique_tr
fund_jif = glm(is_fund_pred ~ jif2020_5 + year_firstpub, family = "binomial", data = unique_t
reg_jif = glm(is_register_pred ~ jif2020_5 + year_firstpub, family = "binomial", data = uniqu
data_jif = glm(is_open_data ~ jif2020_5 + year_firstpub, family = "binomial", data = unique_t
code_jif = glm(is_open_code ~ jif2020_5 + year_firstpub, family = "binomial", data = unique_t
```

```

terms = paste(as.character(unique(unique_transparency$year_firstpub)), collapse = ", ")

jif_plot = plot_models(coi_jif, fund_jif, reg_jif, data_jif, code_jif, rm.terms = "year_firstpub")

unique_transparency$citedByCount_4 = factor(ifelse(unique_transparency$citedByCount == 0, "0",
          ifelse(unique_transparency$citedByCount > 0 & unique_transparency$citedByCount < 10, "1-10",
            ifelse(unique_transparency$citedByCount > 10 & unique_transparency$citedByCount < 100, "11-100",
              ifelse(unique_transparency$citedByCount > 100, "> 100"))))

coi_cite = glm(is_coi_pred ~ citedByCount_4 + year_firstpub, family = "binomial", data = unique_transparency)
fund_cite = glm(is_fund_pred ~ citedByCount_4 + year_firstpub, family = "binomial", data = unique_transparency)
reg_cite = glm(is_register_pred ~ citedByCount_4 + year_firstpub, family = "binomial", data = unique_transparency)
data_cite = glm(is_open_data ~ citedByCount_4 + year_firstpub, family = "binomial", data = unique_transparency)
code_cite = glm(is_open_code ~ citedByCount_4 + year_firstpub, family = "binomial", data = unique_transparency)

cite_plot = plot_models(coi_cite, fund_cite, reg_cite, data_cite, code_cite, rm.terms = "year_firstpub")

figure2A = ggarrange(jif_plot + theme(legend.title=element_blank()), cite_plot + theme(legend.title=element_blank()))

# Reviews
reviews = unique_transparency %>% filter(is_review == T)

coi_jif_reviews = glm(is_coi_pred ~ jif2020_5 + year_firstpub, family = "binomial", data = reviews)
fund_jif_reviews = glm(is_fund_pred ~ jif2020_5 + year_firstpub, family = "binomial", data = reviews)
reg_jif_reviews = glm(is_register_pred ~ jif2020_5 + year_firstpub, family = "binomial", data = reviews)
data_jif_reviews = glm(is_open_data ~ jif2020_5 + year_firstpub, family = "binomial", data = reviews)
code_jif_reviews = glm(is_open_code ~ jif2020_5 + year_firstpub, family = "binomial", data = reviews)

jif_plot_reviews = plot_models(coi_jif_reviews, fund_jif_reviews, reg_jif_reviews, data_jif_reviews, code_jif_reviews, rm.terms = "year_firstpub")

coi_cite_reviews = glm(is_coi_pred ~ citedByCount_4 + year_firstpub, family = "binomial", data = reviews)
fund_cite_reviews = glm(is_fund_pred ~ citedByCount_4 + year_firstpub, family = "binomial", data = reviews)
reg_cite_reviews = glm(is_register_pred ~ citedByCount_4 + year_firstpub, family = "binomial", data = reviews)
data_cite_reviews = glm(is_open_data ~ citedByCount_4 + year_firstpub, family = "binomial", data = reviews)
code_cite_reviews = glm(is_open_code ~ citedByCount_4 + year_firstpub, family = "binomial", data = reviews)

cite_plot_reviews = plot_models(coi_cite_reviews, fund_cite_reviews, reg_cite_reviews, data_cite_reviews, code_cite_reviews, rm.terms = "year_firstpub")

figure2B = ggarrange(jif_plot_reviews + theme(legend.title=element_blank()), cite_plot_reviews + theme(legend.title=element_blank()))

```

```

# Trials
trials = unique_transparency %>% filter(is_trial == T)

coi_jif_trials = glm(is_coi_pred ~ jif2020_5 + year_firstpub, family = "binomial", data = trials)
fund_jif_trials = glm(is_fund_pred ~ jif2020_5 + year_firstpub, family = "binomial", data = trials)
reg_jif_trials = glm(is_register_pred ~ jif2020_5 + year_firstpub, family = "binomial", data = trials)
data_jif_trials = glm(is_open_data ~ jif2020_5 + year_firstpub, family = "binomial", data = trials)
code_jif_trials = glm(is_open_code ~ jif2020_5 + year_firstpub, family = "binomial", data = trials)

jif_plot_trials = plot_models(coi_jif_trials, fund_jif_trials, reg_jif_trials, data_jif_trials, code_jif_trials)

coi_cite_trials = glm(is_coi_pred ~ citedByCount_4 + year_firstpub, family = "binomial", data = trials)
fund_cite_trials = glm(is_fund_pred ~ citedByCount_4 + year_firstpub, family = "binomial", data = trials)
reg_cite_trials = glm(is_register_pred ~ citedByCount_4 + year_firstpub, family = "binomial", data = trials)
data_cite_trials = glm(is_open_data ~ citedByCount_4 + year_firstpub, family = "binomial", data = trials)
code_cite_trials = glm(is_open_code ~ citedByCount_4 + year_firstpub, family = "binomial", data = trials)

cite_plot_trials = plot_models(coi_cite_trials, fund_cite_trials, reg_cite_trials, data_cite_trials, code_cite_trials)

figure2C = ggarrange(jif_plot_trials + theme(legend.title=element_blank()), cite_plot_trials)

figure2 = ggarrange(figure2A, figure2B, figure2C, ncol = 1, nrow = 3, common.legend = T, labels = c("A", "B", "C"))

# ggsave("figures/Figure2.png", figure2, dpi = 800, width = 27, height = 30, units = "cm")
# ggsave("figures/Figure2.tiff", figure2, dpi = 800, width = 27, height = 30, units = "cm", compression = "lzw")

```

```
figure2
```

sclosure — Funding disclosure — Protocol registration — Data sharing — C

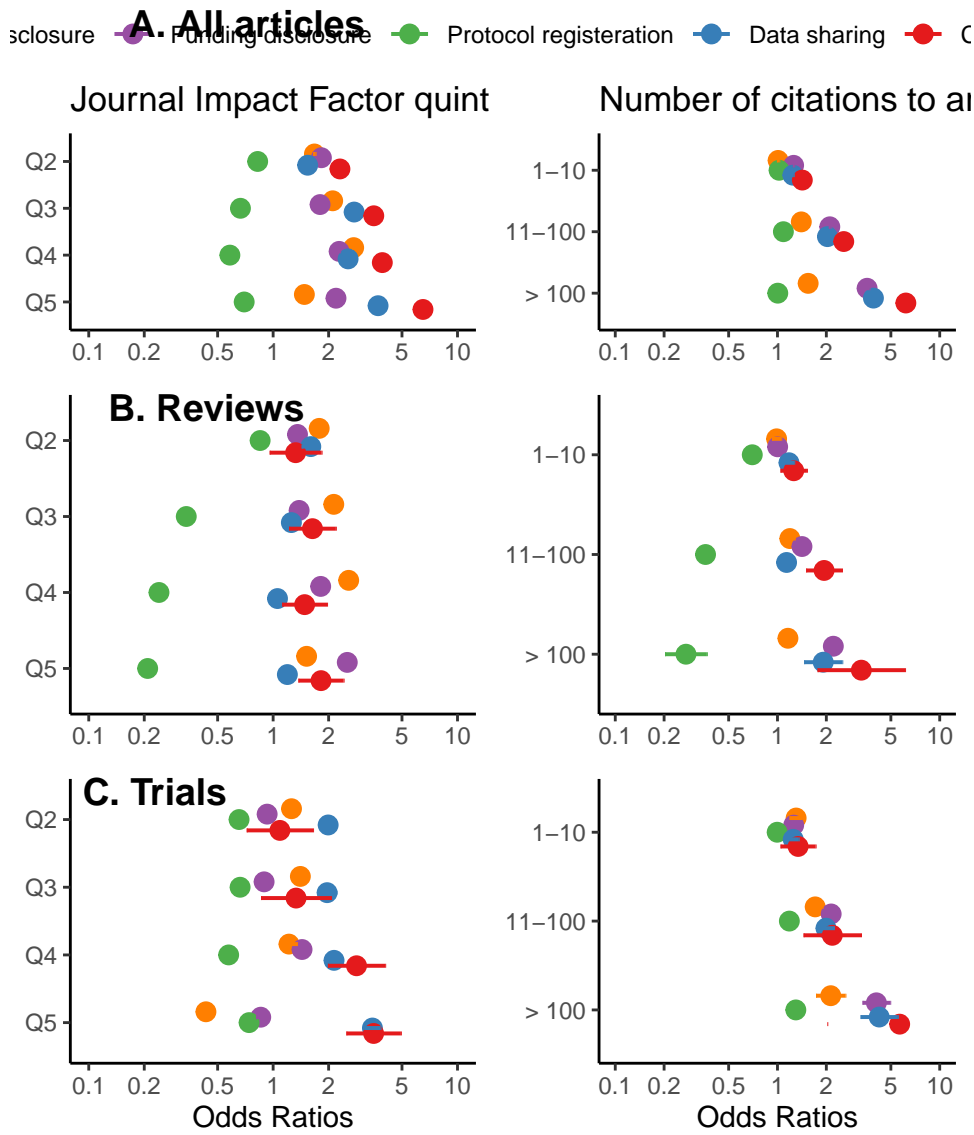

## 2.7 Publisher differences

Let's take a look at the top most and least transparent publishers in each indicator.

### 2.7.1 Conflict of interest disclosure

```
unique_transparency %>%
  select(is_coi_pred, scimago_publisher) %>%
```

```

group_by(scimago_publisher) %>%
summarise(coi = sum(is_coi_pred)/n()*100) %>%
arrange(desc(coi)) %>%
head(5)

```

```

# A tibble: 5 x 2
  scimago_publisher      coi
  <chr>                <dbl>
1 AME Publishing Company    100
2 Academia Nacional de Medicina 100
3 Academy of Medical Sciences of I.R. Iran 100
4 Acta Cardiologica        100
5 American Academy of Pediatrics 100

```

It seems many publishers had 100% transparency. Let's check how many are these:

```

nrow(unique_transparency %>%
  select(is_coi_pred, scimago_publisher) %>%
  group_by(scimago_publisher) %>%
  summarise(coi = sum(is_coi_pred)/n()*100) %>%
  filter(coi == 100))

```

```
[1] 71
```

Now, the top lowest adherence:

```

unique_transparency %>%
  select(is_coi_pred, scimago_publisher) %>%
  group_by(scimago_publisher) %>%
  summarise(coi = sum(is_coi_pred)/n()*100) %>%
  arrange(coi) %>%
  head(5)

```

```

# A tibble: 5 x 2
  scimago_publisher      coi
  <chr>                <dbl>
1 Histology and Histopathology    0
2 International Union of Crystallography 0
3 National Co-ordinating Centre for HTA 0
4 Sociedad Espanola de Medicina Interna (SEMI) 0
5 Sub Rosa                        0

```

It seems there are more than one. Let's count them:

```
nrow(unique_transparency %>%
  select(is_coi_pred, scimago_publisher) %>%
  group_by(scimago_publisher) %>%
  summarise(coi = sum(is_coi_pred)/n()*100) %>%
  filter(coi == 0))
```

[1] 8

## 2.7.2 Funding disclosure

```
unique_transparency %>%
  select(is_fund_pred, scimago_publisher) %>%
  group_by(scimago_publisher) %>%
  summarise(fund = sum(is_fund_pred)/n()*100) %>%
  arrange(desc(fund)) %>%
  head(5)
```

```
# A tibble: 5 x 2
  scimago_publisher      fund
  <chr>                 <dbl>
1 AO Research Institute      100
2 Alcohol Research Documentation, Inc. 100
3 American Academy of Pediatrics      100
4 American Association for the Advancement of Science 100
5 American Association of Immunologists      100
```

```
unique_transparency %>%
  select(is_fund_pred, scimago_publisher) %>%
  group_by(scimago_publisher) %>%
  summarise(fund = sum(is_fund_pred)/n()*100) %>%
  arrange(fund) %>%
  head(5)
```

```
# A tibble: 5 x 2
  scimago_publisher      fund
  <chr>                 <dbl>
1 Acta Cardiologica      0
```

|                                         |   |
|-----------------------------------------|---|
| 2 Cairo University                      | 0 |
| 3 Deutscher Arzte-Verlag                | 0 |
| 4 Histology and Histopathology          | 0 |
| 5 National Co-ordinating Centre for HTA | 0 |

### 2.7.3 Protocol registration

```
unique_transparency %>%
  select(is_register_pred, scimago_publisher) %>%
  group_by(scimago_publisher) %>%
  summarise(register = sum(is_register_pred)/n()*100) %>%
  arrange(desc(register)) %>%
  head(5)
```

```
# A tibble: 5 x 2
  scimago_publisher      register
  <chr>                 <dbl>
1 American Society for Nutrition    40.0
2 OceanSide Publications Inc.       35
3 Lancet Publishing Group           29.5
4 Massachusetts Medical Society     27.0
5 American Heart Association        25.4
```

```
unique_transparency %>%
  select(is_register_pred, scimago_publisher) %>%
  group_by(scimago_publisher) %>%
  summarise(register = sum(is_register_pred)/n()*100) %>%
  arrange(register) %>%
  head(5)
```

```
# A tibble: 5 x 2
  scimago_publisher      register
  <chr>                 <dbl>
1 AO Research Institute            0
2 Academia Nacional de Medicina    0
3 Acoustical Society of America    0
4 Acta Cardiologica                0
5 Alcohol Research Documentation, Inc. 0
```



## 2.7.4 Data sharing

```
unique_transparency %>%
  select(is_open_data, scimago_publisher) %>%
  group_by(scimago_publisher) %>%
  summarise(data = sum(is_open_data)/n()*100) %>%
  arrange(desc(data)) %>%
  head(5)
```

```
# A tibble: 5 x 2
  scimago_publisher      data
  <chr>                 <dbl>
1 International Union of Crystallography 100
2 American Association for the Advancement of Science 67.0
3 Genetics Society of America 62.9
4 Cold Spring Harbor Laboratory Press 60.3
5 Microbiology Society 58.6
```

```
unique_transparency %>%
  select(is_open_data, scimago_publisher) %>%
  group_by(scimago_publisher) %>%
  summarise(data = sum(is_open_data)/n()*100) %>%
  arrange(data) %>%
  head(5)
```

```
# A tibble: 5 x 2
  scimago_publisher      data
  <chr>                 <dbl>
1 Academia Nacional de Medicina 0
2 Acta Cardiologica 0
3 American Cleft Palate Craniofacial Association 0
4 American College of Allergy, Asthma and Immunology 0
5 American Dental Association 0
```

## 2.7.5 Code sharing

```
unique_transparency %>%
  select(is_open_code, scimago_publisher) %>%
```

```

group_by(scimago_publisher) %>%
summarise(code = sum(is_open_code)/n()*100) %>%
arrange(desc(code)) %>%
head(5)

```

```

# A tibble: 5 x 2
  scimago_publisher      code
  <chr>                <dbl>
1 Cold Spring Harbor Laboratory Press 40.5
2 MIT Press Journals                35.1
3 American College of Physicians      20
4 Thieme Medical Publishers           20
5 Microbiology Society               18.7

```

```

unique_transparency %>%
  select(is_open_code, scimago_publisher) %>%
  group_by(scimago_publisher) %>%
  summarise(code = sum(is_open_code)/n()*100) %>%
  arrange(code) %>%
  head(5)

```

```

# A tibble: 5 x 2
  scimago_publisher      code
  <chr>                <dbl>
1 ""                    0
2 "AO Research Institute" 0
3 "AOSIS (Pty) Ltd"       0
4 "Academia Nacional de Medicina" 0
5 "Academy of Managed Care Pharmacy (AMCP)" 0

```
